# Supplementary material for: Renal Endothelial Single-Cell Transcriptomics Reveals Spatiotemporal Regulation and Divergent Roles of Differential Gene Transcription and Alternative Splicing in Murine Diabetic Nephropathy
Source: MDPI journal article supplement (doi:10.3390/ijms25084320), 2024-04-13
Supplement: s1 [file s1]

## Supplemental Figures and Tables for:

### **Renal endothelial single-cell transcriptomics reveals spatiotemporal regulation and divergent roles of differential gene transcription and alternative splicing in murine diabetic nephropathy**

Alex-Xianghua Zhou<sup>1,§</sup>, Marie Jeansson<sup>2,3,§</sup>, Liqun He<sup>2,3</sup>, Leif Wigge<sup>4</sup>, Pernilla Tonelius<sup>1</sup>, Ramesh Tati<sup>1</sup>, Linda Cederblad<sup>1</sup>, Lars Muhl<sup>2</sup>, Martin Uhrbom<sup>1,2</sup>, Jianping Liu<sup>2</sup>, Anna Björnson Granqvist<sup>1</sup>, Lilach O. Lerman<sup>5</sup>, Christer Betsholtz<sup>2,3,#</sup>, Pernille B. L. Hansen<sup>1,#</sup>

<sup>1</sup>*Research and Early Development, Cardiovascular, Renal and Metabolism, BioPharmaceuticals R&D, AstraZeneca, Gothenburg, Sweden*

<sup>2</sup>*Department of Medicine Huddinge, Karolinska Institutet, Huddinge, Sweden*

<sup>3</sup>*Department of Immunology, Genetics and Pathology, Uppsala University, Uppsala, Sweden*

<sup>4</sup>*Data Sciences and Quantitative Biology, Discovery Sciences, BioPharmaceuticals R&D, AstraZeneca, Gothenburg, Sweden*

<sup>5</sup>*Division of Nephrology and Hypertension, Mayo Clinic, Rochester, MN, United States*

<sup>§,#</sup> *Equal contribution*

**Correspondence:** Pernille B. L. Hansen, Cardiovascular, Renal and Metabolism, AstraZeneca AB R&D, Pepparedsleden 1, 431 50 Mölndal, Sweden. Email: [pernille.laerkegaardhansen@astrazeneca.com](mailto:pernille.laerkegaardhansen@astrazeneca.com)

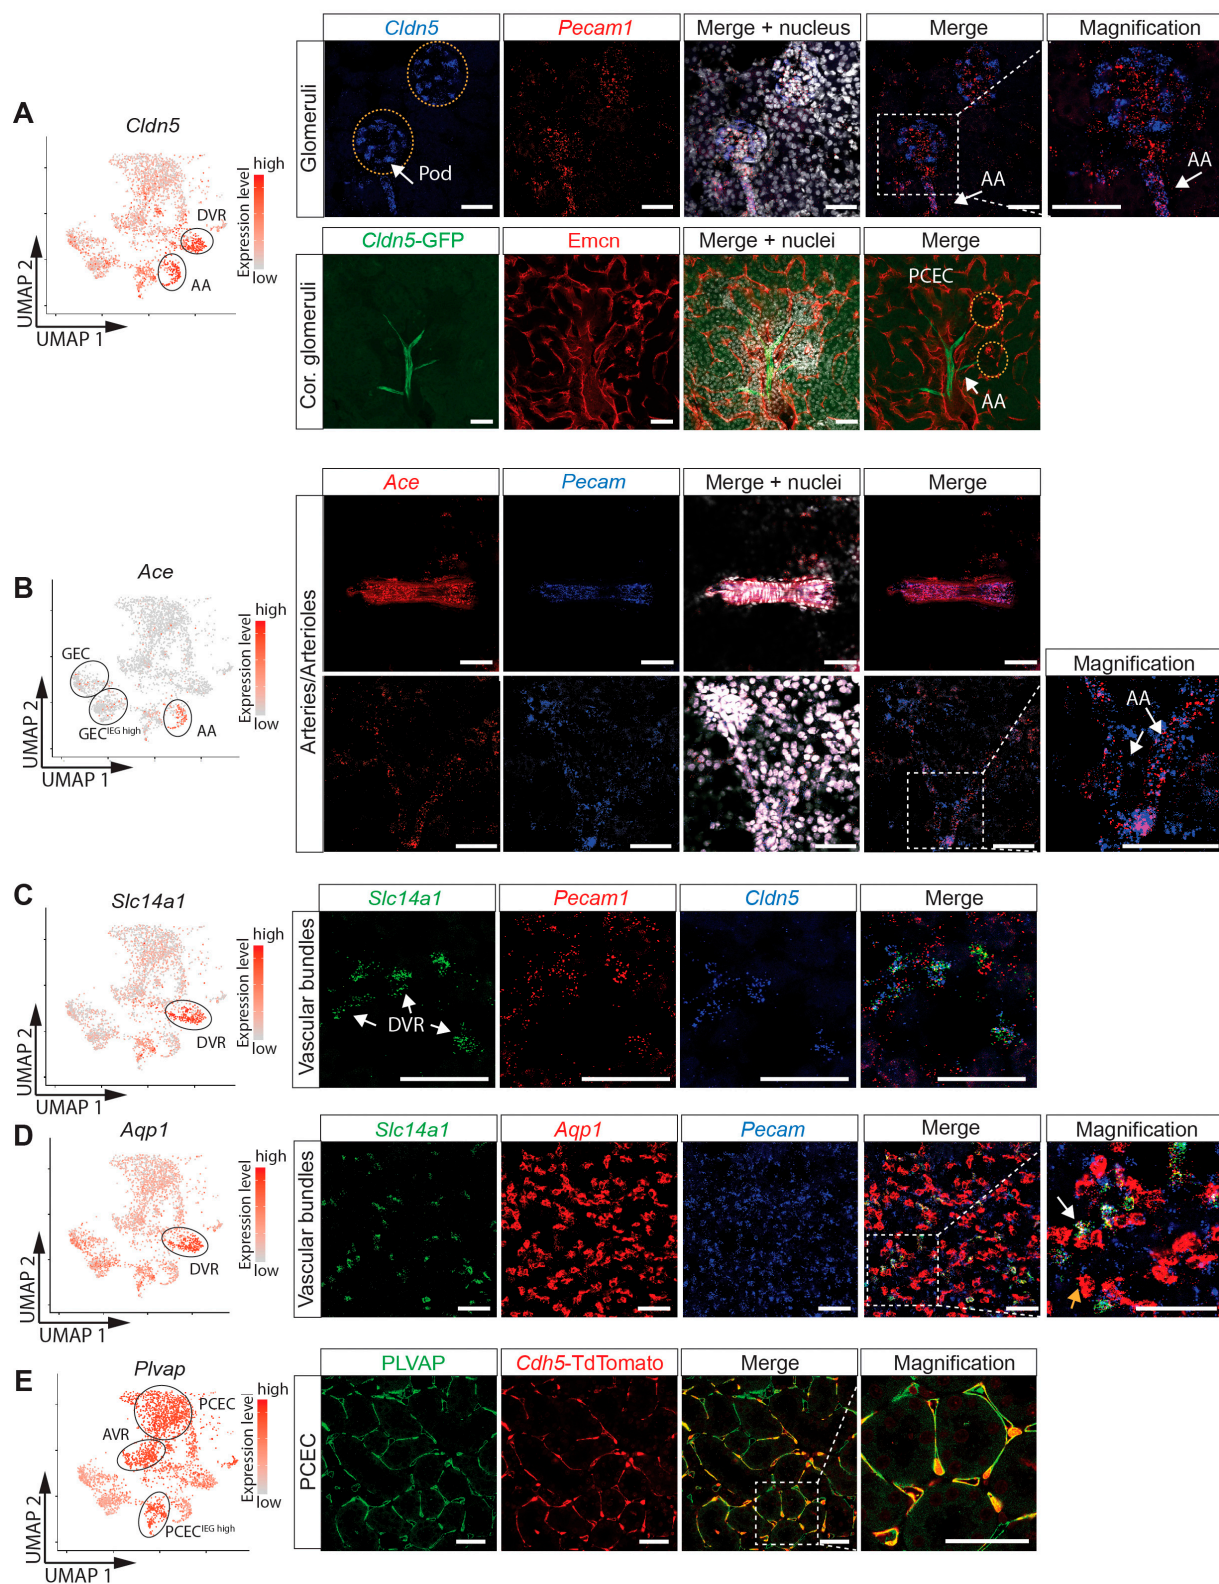

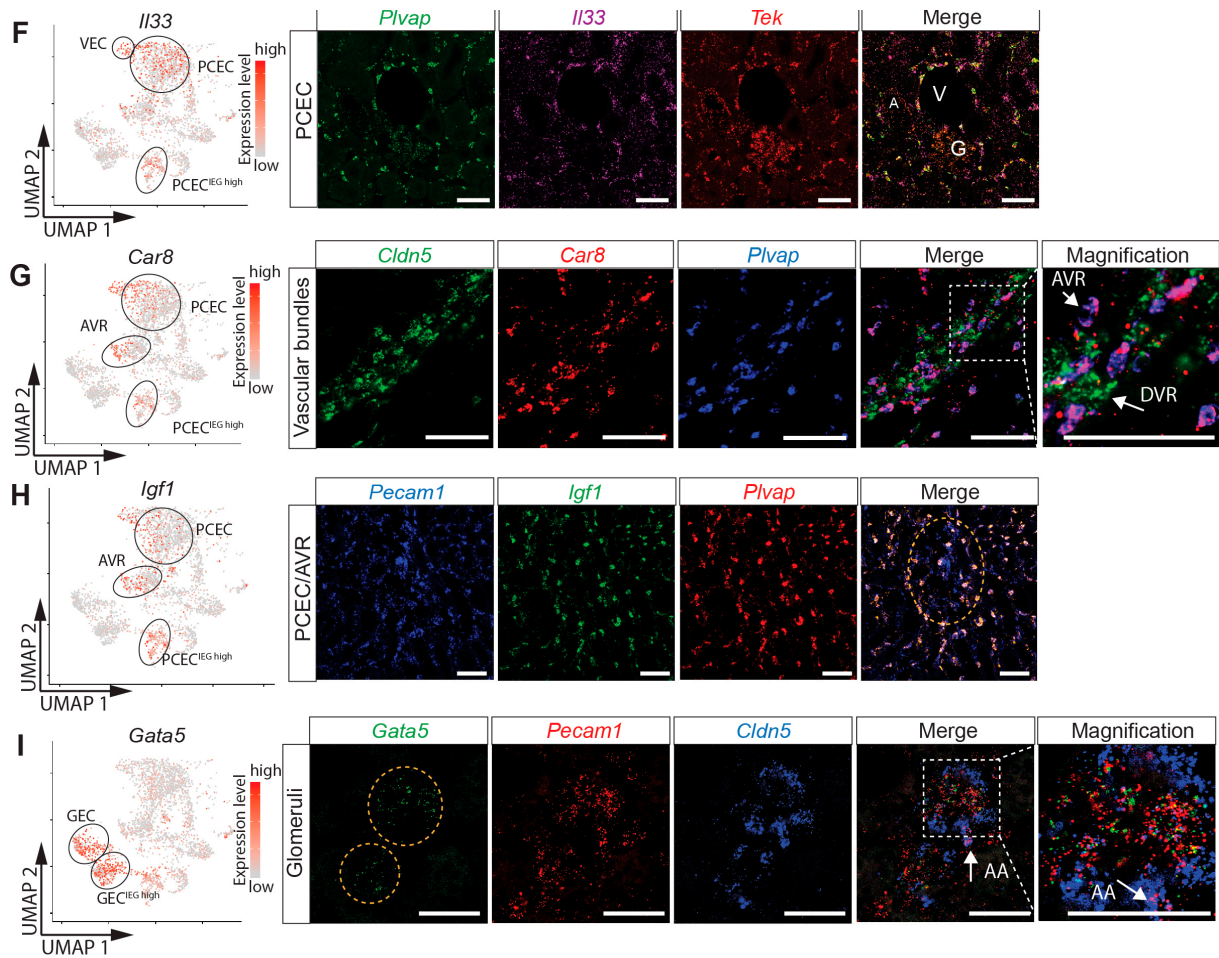

**Figure S1.** Validation of vascular subpopulations in C57BL6/J mice. (A) UMAP of *Cldn5* and RNA-ISH for *Cldn5* in arteries and afferent arterioles (AA) together with *Pecam1* expression. *Cldn5* expression can also be seen in podocytes (Pod), excluded from *Pecam1*<sup>+</sup> cells in the glomerulus, but colocalizing with *Pecam1* in the afferent arteriole (AA). *Cldn5*-GFP reporter mice showed GFP expression in arterioles and afferent arterioles (AA) but not in podocytes. Orange circles indicate glomeruli. (B) UMAP of *Ace* and RNA-ISH identified *Ace* as a novel marker for arteries and afferent arteriole (AA). Lower panel shows afferent arteriole (AA) with *Ace* expression branching to two glomeruli. (C) UMAP of the known descending vasa recta (DVR) marker *Slc14a1*. *Slc14a1* RNA-ISH show colocalization of *Slc14a1* with *Cldn5* in DVR (arrows). (D) UMAP of *Aqp1* and RNA-ISH for *Aqp1* show *Aqp1* expression in DVR (white arrow), but at much lower levels than in epithelial cells (yellow arrow) of the medulla. (E) UMAP of *Plvap* and immunohistochemistry staining of PLVAP show its expression in PCEC together with *Cdh5*-driven TdTomato. (F) UMAP of *Il33* and RNA-ISH for *Il33* show its expression in PCEC, VEC (V, veins) but not in glomeruli (G) or arteries (A). (G) UMAP of *Car8* and RNA-ISH for *Car8* show its expression in *Plvap*<sup>+</sup> ascending vasa recta (AVR) but not in *Cldn5*<sup>+</sup> DVR in vascular bundles. (H) UMAP of *Igf1* and RNA-ISH for *Igf1* show its expression in *Plvap*<sup>+</sup> AVR in vascular bundles indicated by yellow circle and in PCEC. (I) UMAP of *Gata5* and RNA-ISH for *Gata5* show specific expression in GEC, glomeruli marked with orange circle. Scale bar = 50  $\mu$ m.

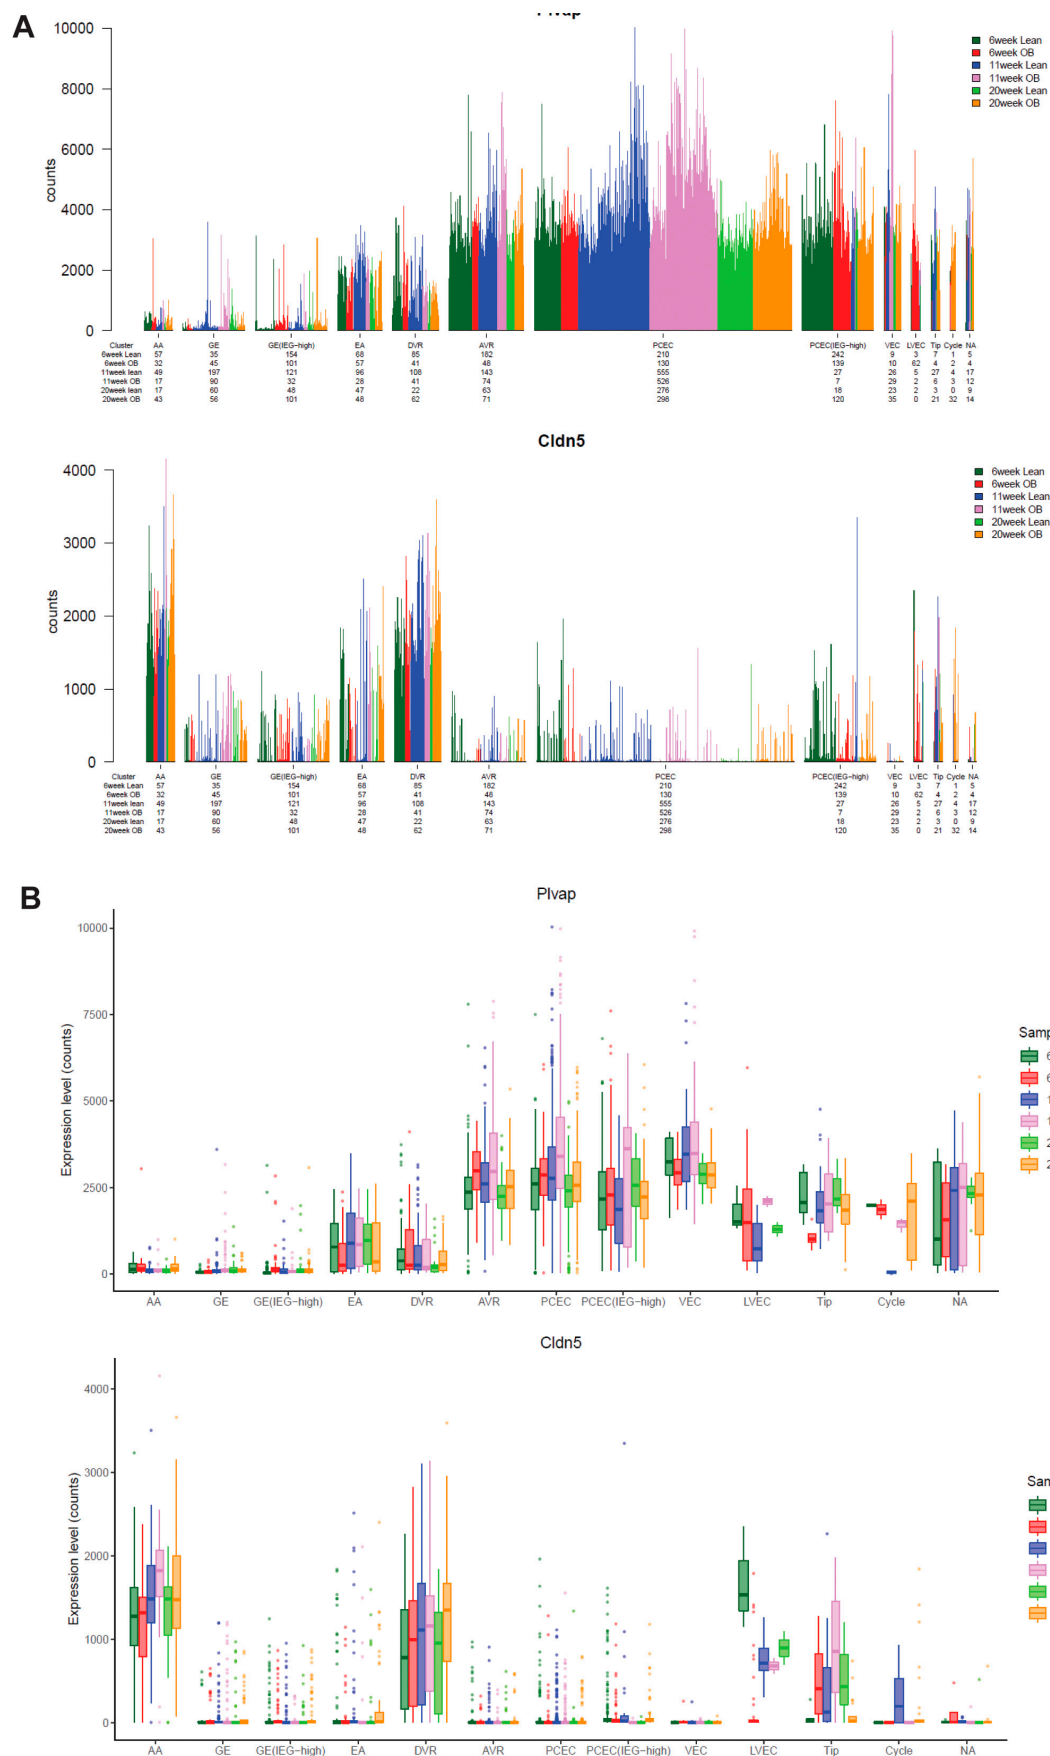



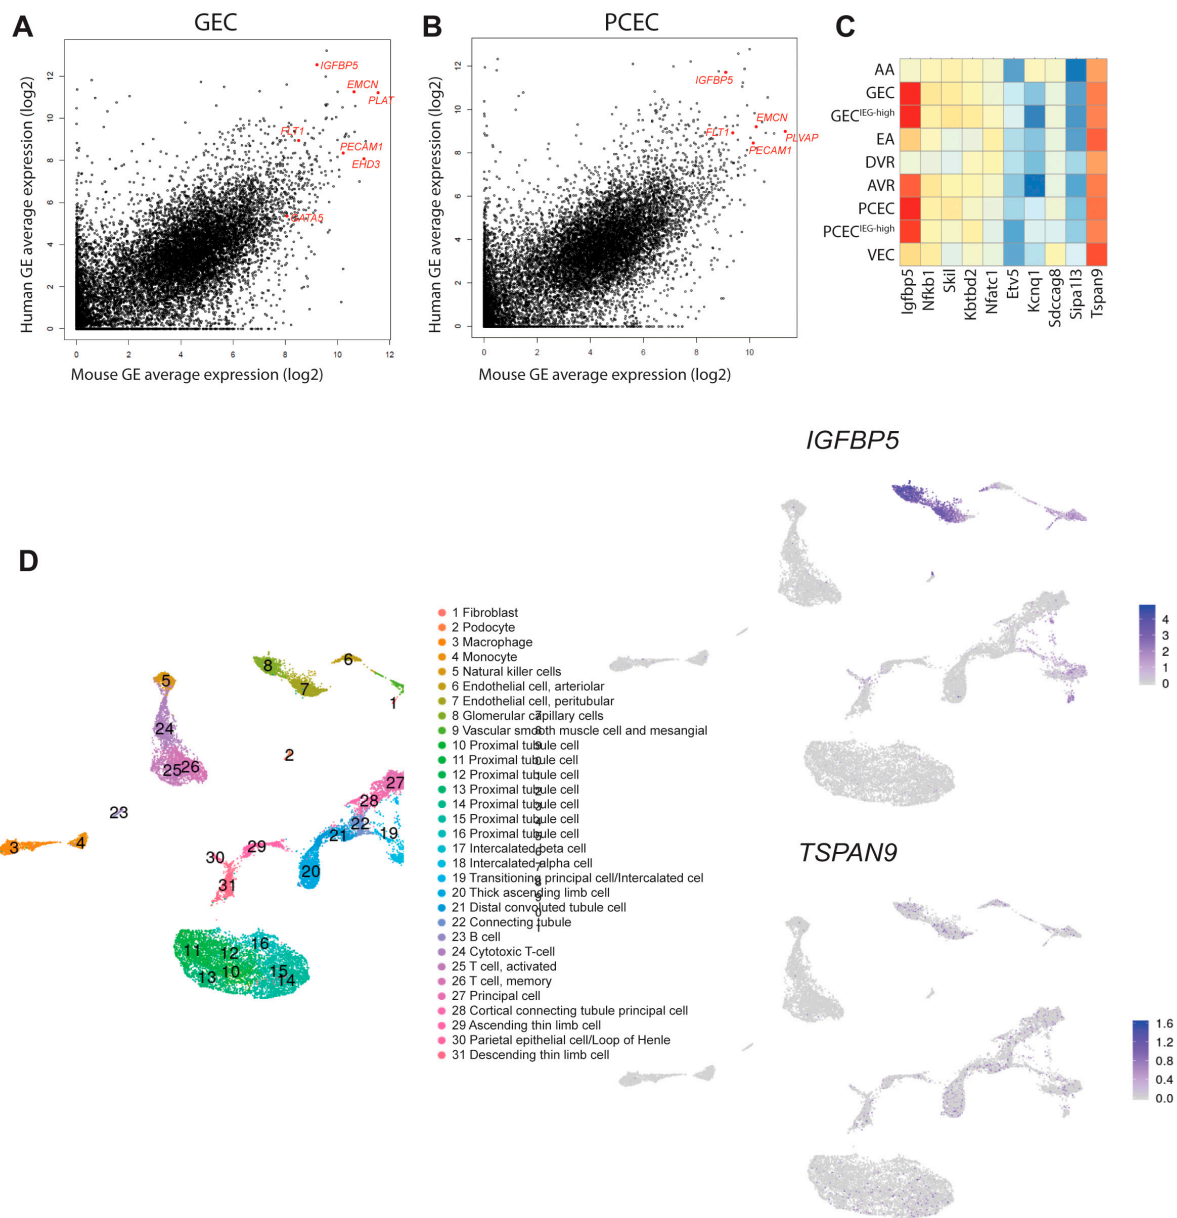

**Figure S3.** Mouse and human expression correlation. (A, B) Comparison of human GEC (A) and PCEC (B) to the same EC population in the current dataset. (C) 10 of 53 genes associated with human DKD by GWAS could be mapped to EC expression in the current dataset. (D) *IGFBP5* and *TSPAN9* in human EC show similar expression pattern as in mouse.

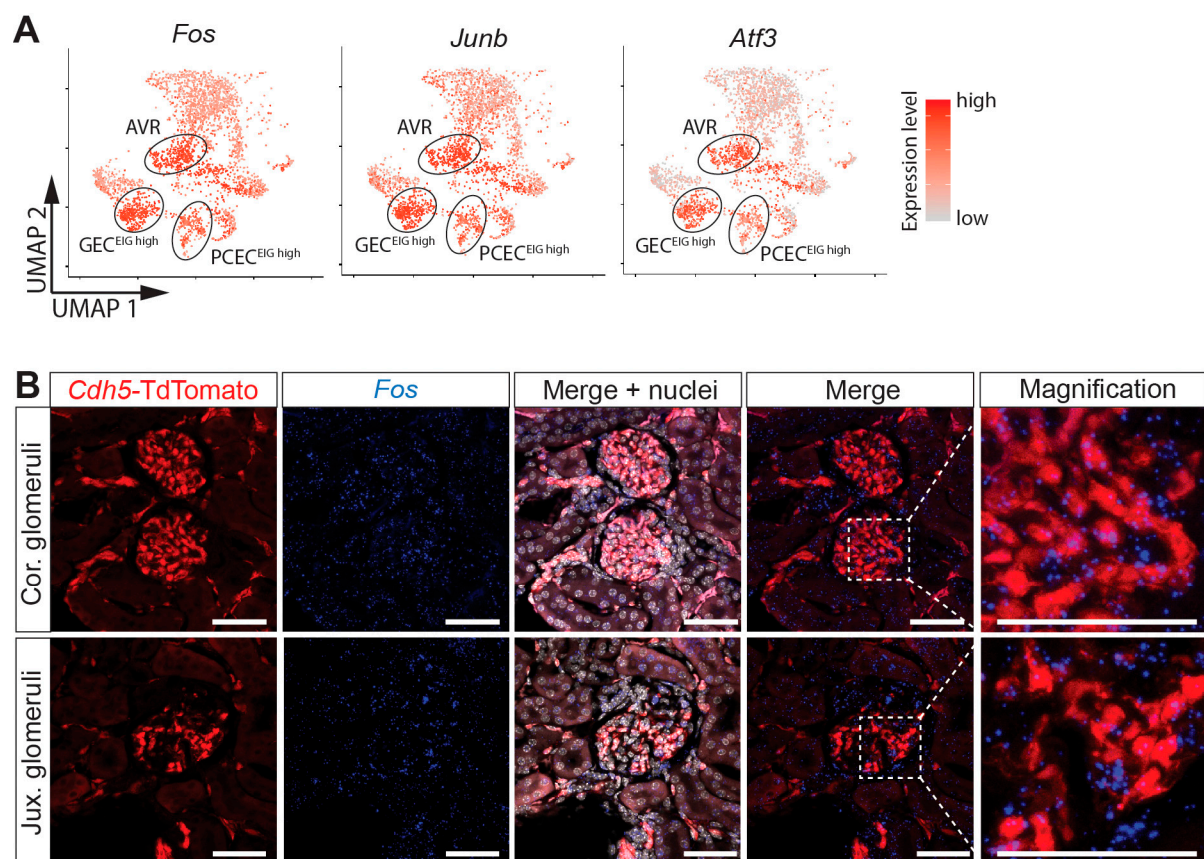

**Figure S4.** Immediate early gene (IEG) expression. (A) UMAP's for the IEG's *Fos*, *Junb*, and *Atf3* in BTBR<sup>ob/ob</sup> and Lean mice. (B) RNA-ISH for *Fos* in cortical and juxtamedullary glomeruli showing endothelial cells with *Cdh5*-TdTomato (red) in C57BL6/J mice. Scale bars = 50  $\mu$ m.

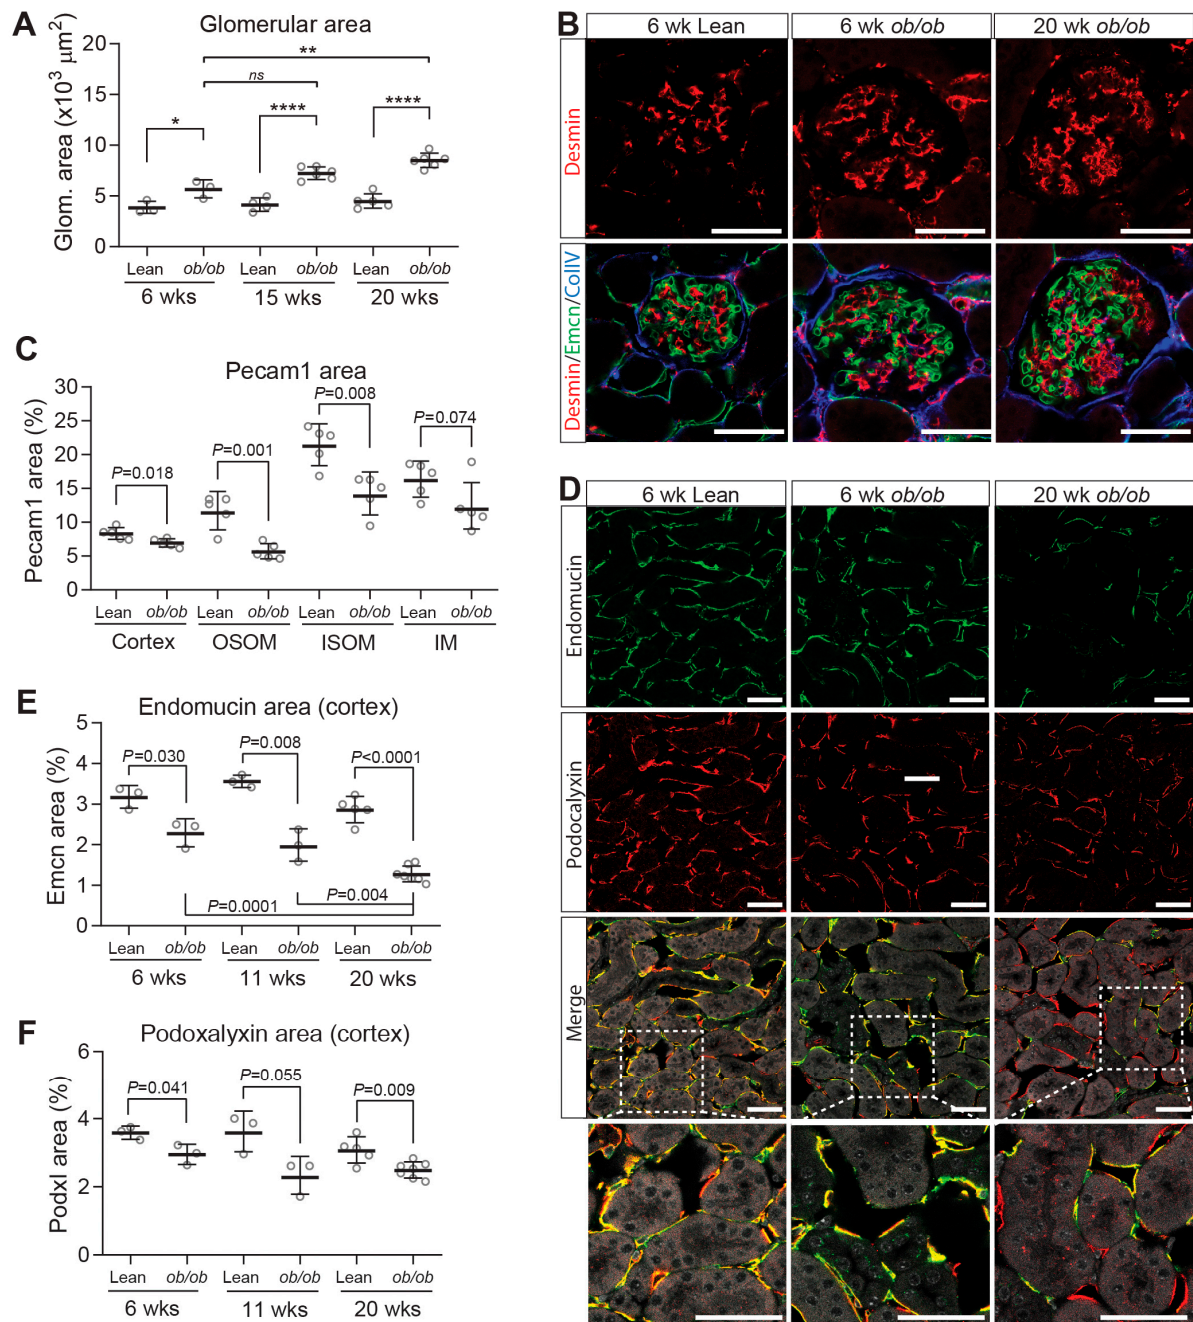

**Figure S5.** Diabetic kidney disease in BTBRob/ob mice. (A, B) Quantification of glomerular area from immunohistochemistry of glomeruli for desmin, collagen IV, and endomucin at indicated timepoints in non-diabetic (Lean) and diabetic (ob/ob) mice. (C) Quantification of PECAM1 stained area in different regions of the kidney; cortex, outer stripe of medulla (OSOM), inner stripe of medulla (ISOM), and inner medulla (IM) in 11-week-old non-diabetic (Lean) and diabetic (ob/ob) mice. (D) Representative images and (E, F) quantification of capillary density from immunohistochemistry for endomucin and podocalyxin in renal cortex of non-diabetic (Lean) and diabetic (ob/ob) mice at indicated ages. Data expressed as mean ± SD. Scale bar = 50 μm. \*p<0.05, \*\*p<0.01, and \*\*\*\*p<0.0001.



### A Statistical analysis, GEC 20 weeks

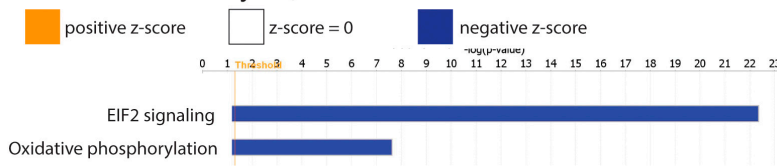

### B Statistical analysis, PCEC 20 weeks

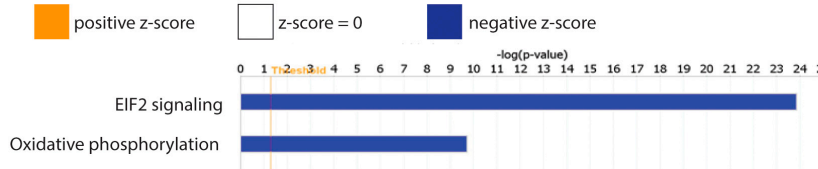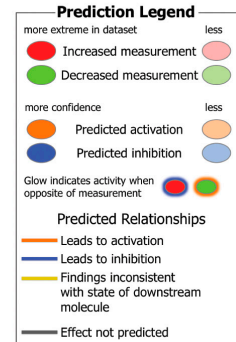

### C Oxidative phosphorylation, GEC 20 weeks

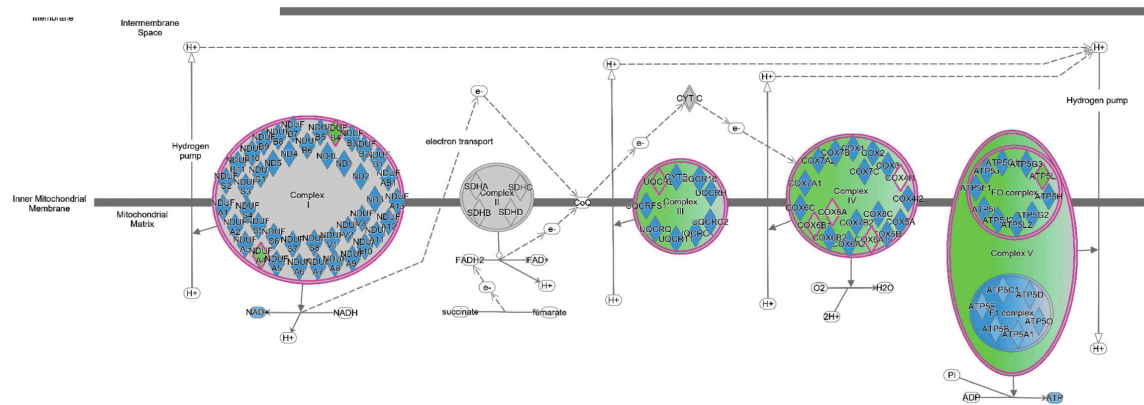

### D Oxidative phosphorylation, PCEC 20 weeks

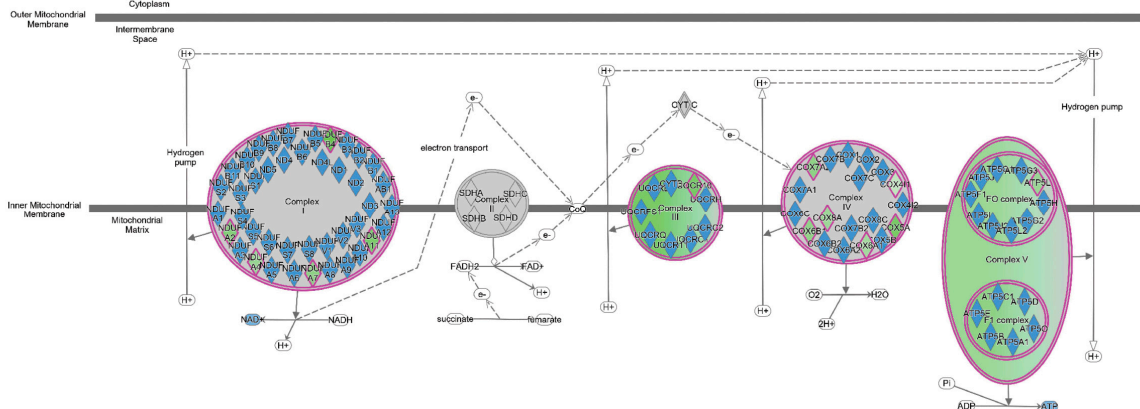

**Figure S6.** Statistics of the top enriched pathways and oxidative phosphorylation in BTB*Rob/ob* GEC and PCEC at 20 weeks. Statistical analysis of EIF2 signaling and oxidative phosphorylation in GEC (A) and PCEC (B) at 20 weeks based on DEGs comparing non-diabetic (Lean) and diabetic (*ob/ob*) mice. Schematic diagram of oxidative phosphorylation in GEC (C) and PCEC (D) at 20 weeks.



## A EIF2 signaling, PCEC 6 weeks

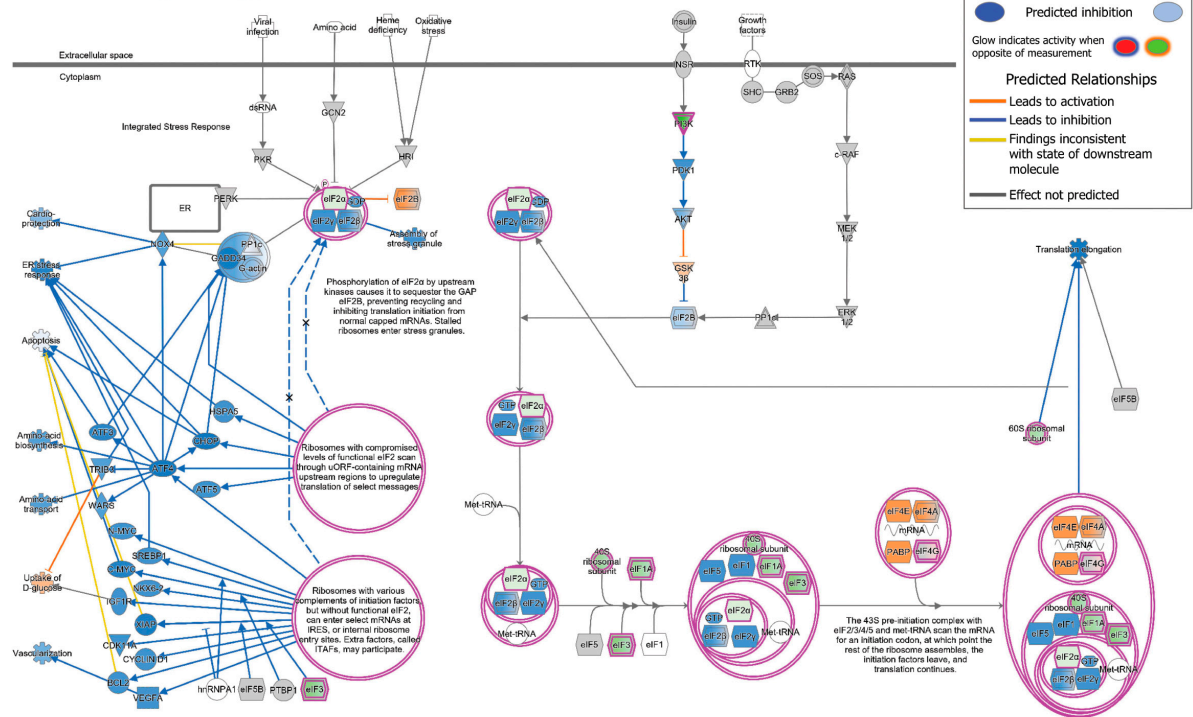

## B EIF2 signaling, PCEC 20 weeks

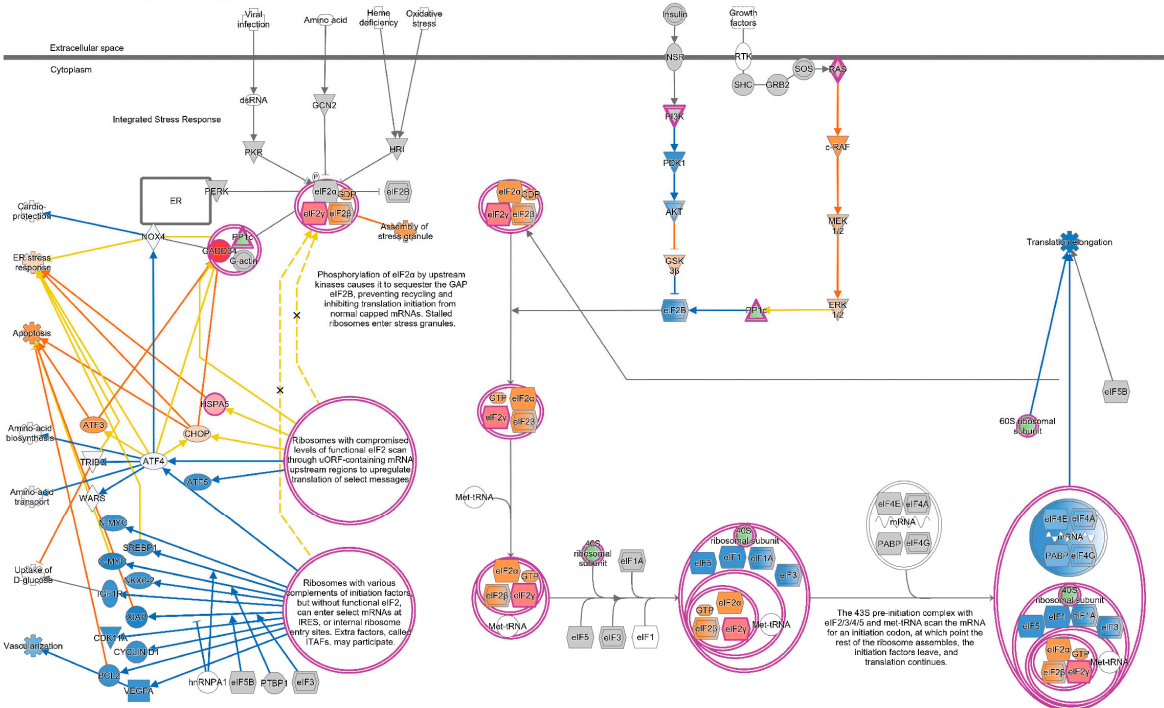

**Figure S7.** EIF2 signaling in BTBRob/ob PCEC at 6 and 20 weeks. Schematic diagram of EIF2 signaling in PCEC at 6 weeks (A) and 20 weeks (B).

## A EIF2 signaling, GEC 6 weeks

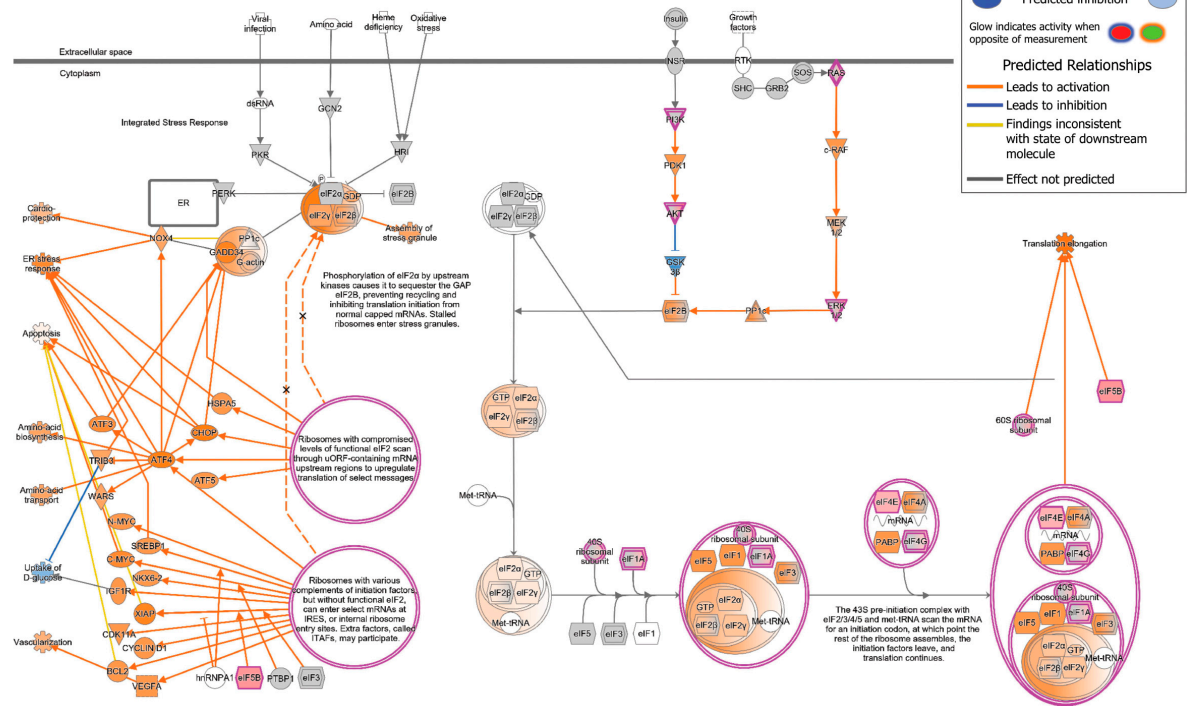

## B EIF2 signaling, GEC 20 weeks

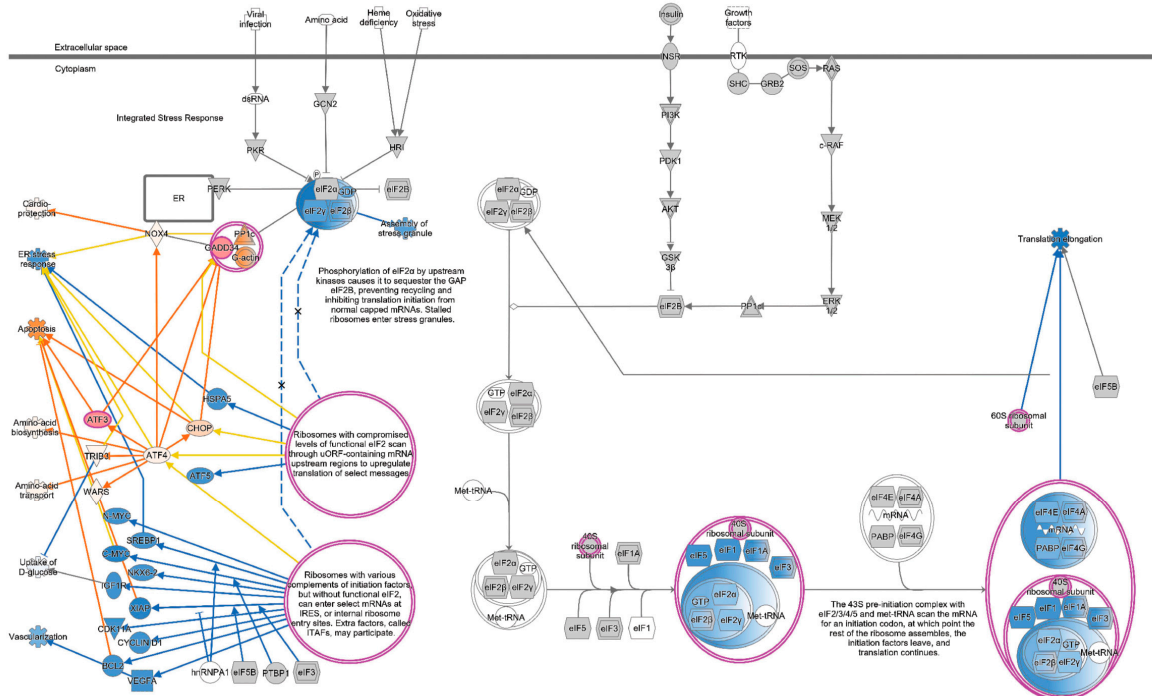

**Figure S8.** EIF2 signaling in BTBRob/ob GEC at 6 and 20 weeks. Schematic diagram of EIF2 signaling in GEC at 6 weeks (A) and 20 weeks (B).

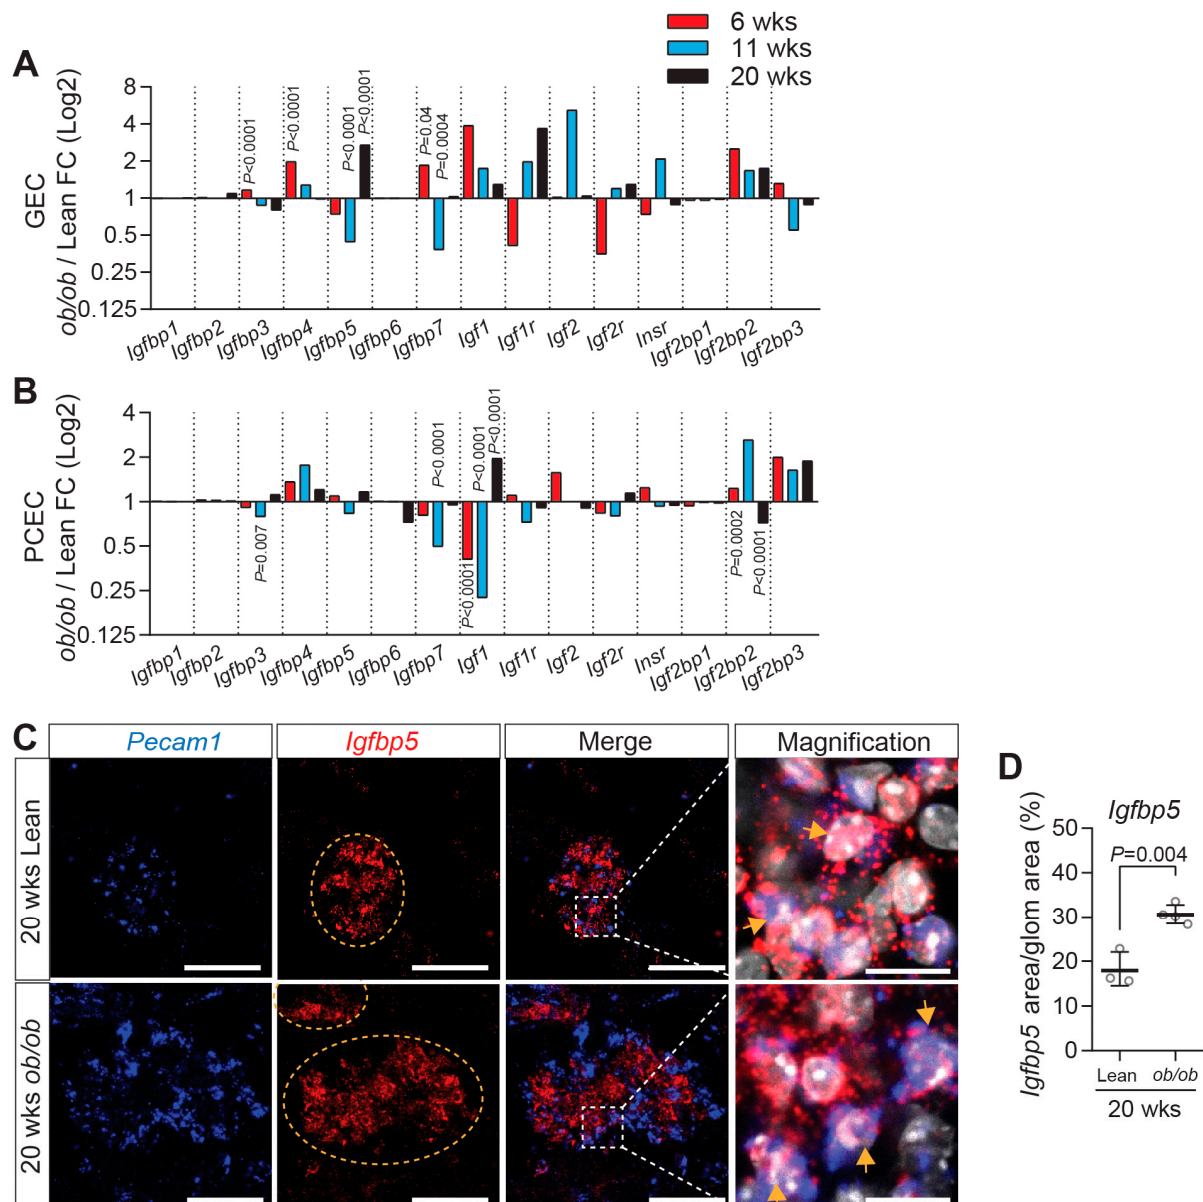

**Figure S9.** The IGF system in diabetic kidney disease in BTBRob/*ob* mice. (A, B) Fold change expression of genes in the IGF system comparing non-diabetic (Lean) and diabetic (*ob/ob*) mice in GEC and PCEC, respectively. (C) RNA-ISH for glomerular expression of *Igfbp5* and *Pecam1* in 20-week-old non-diabetic (Lean) and diabetic (*ob/ob*) mice, glomeruli marked with orange circle. Orange arrows indicate *Pecam*<sup>+</sup>/*Igfbp5*<sup>+</sup> cells. Scale bar = 50  $\mu$ m, magnification scale bar = 10  $\mu$ m. (D) Quantification of *Igfbp5* expression per glomerular area in non-diabetic (Lean) and diabetic mice (*ob/ob*) at 20 weeks. Data expressed as mean  $\pm$  SD.

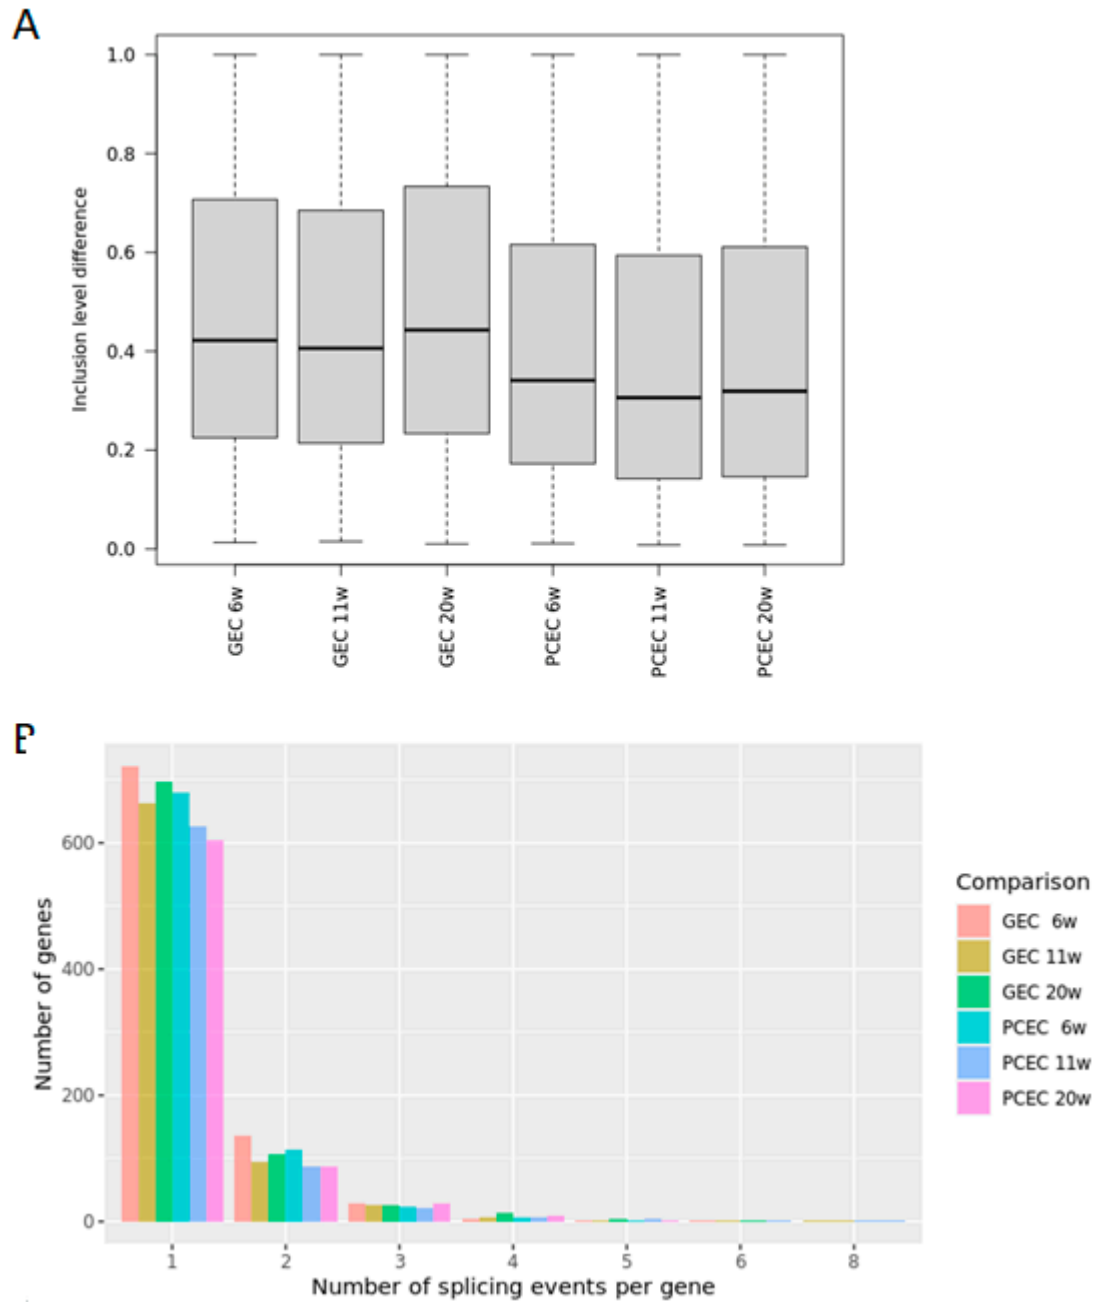

**Figure S10.** Characterization of DSEs in BTBR*ob/ob* mice. (A) Absolute inclusion level difference of DSEs (FDR<0.05) between BTBR<sup>Lean</sup> and BTBR*ob/ob* GEC and PCEC at different timepoints. (B) Number of significant DSEs (FDR<0.05 and absolute inclusion level difference > 0.4) per gene.



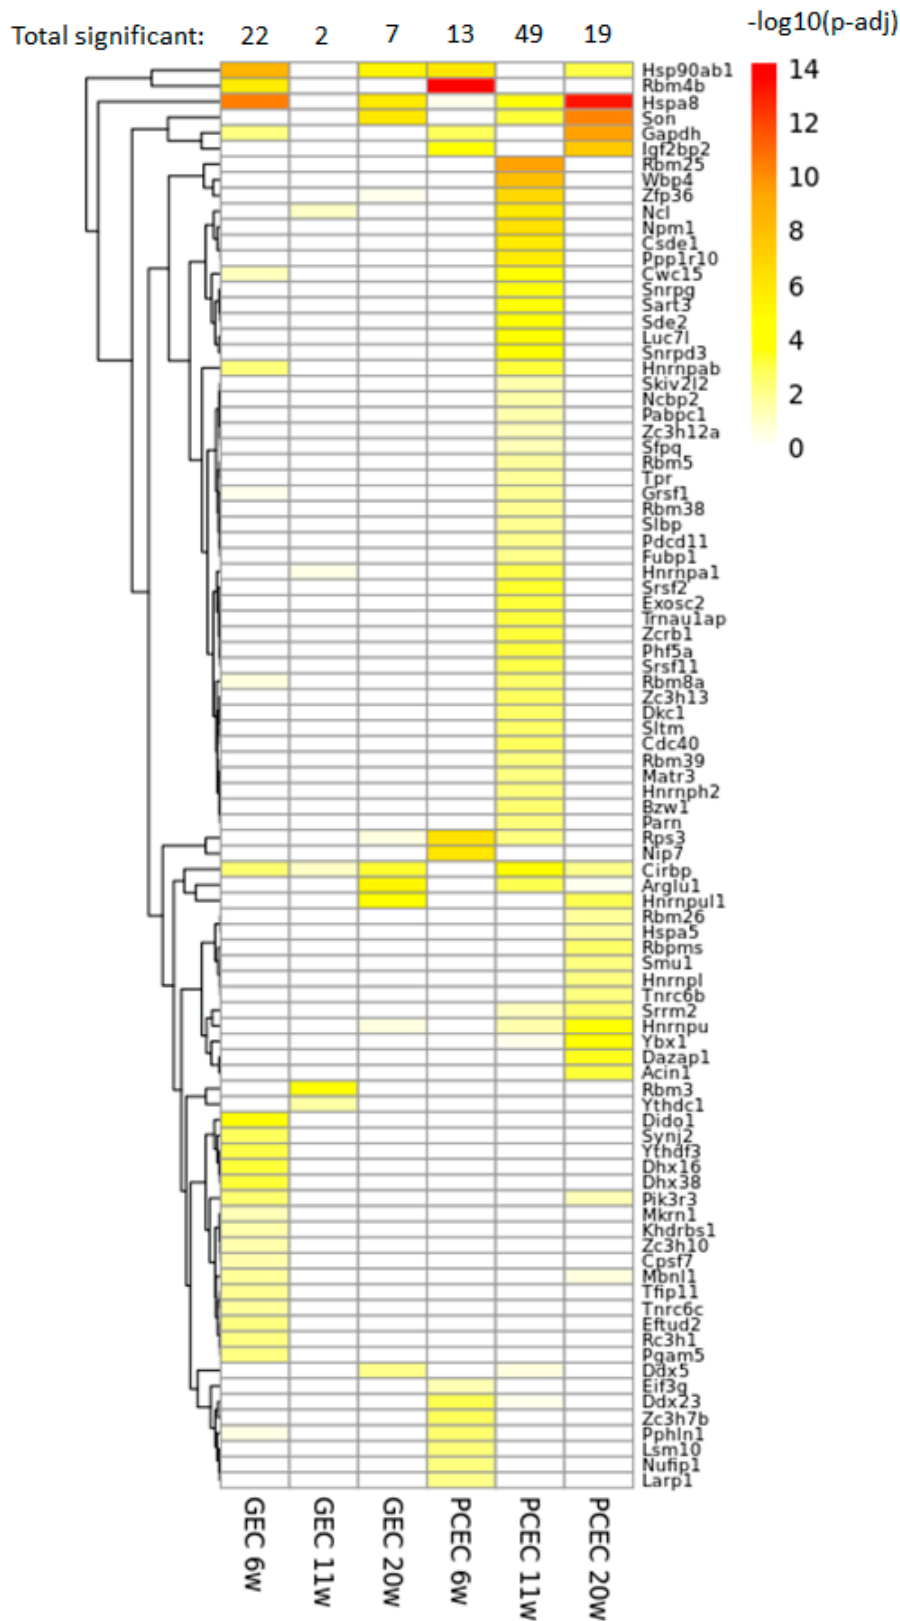

**Figure S11.** Overlapping BTB *Rob/ob* DEGs with a compiled list of mouse RBPs from 3 databases: rMAPS (<http://rmaps.cec.sresearch.org>), RBPDB (<http://rbpdb.cabr.utoronto.ca>), and Spliceosome (<http://spliceosomedb.ucsc.edu>).

## SUPPLEMENTAL TABLES

**Table S1.** Number of sequenced cells per cluster and timepoint

|                          | 6 wks |              | 11 wks |              | 20 wks |              |
|--------------------------|-------|--------------|--------|--------------|--------|--------------|
| Population               | Lean  | <i>ob/ob</i> | Lean   | <i>ob/ob</i> | Lean   | <i>ob/ob</i> |
| GEC                      | 35    | 45           | 197    | 90           | 60     | 56           |
| GEC <sup>IEG-high</sup>  | 154   | 101          | 121    | 32           | 48     | 101          |
| PCEC                     | 210   | 130          | 555    | 526          | 276    | 298          |
| PCEC <sup>IEG-high</sup> | 242   | 139          | 27     | 7            | 18     | 120          |
| AA                       | 57    | 32           | 49     | 17           | 17     | 43           |
| EA                       | 68    | 57           | 96     | 28           | 47     | 48           |
| DVR                      | 85    | 41           | 108    | 41           | 22     | 62           |
| AVR                      | 182   | 48           | 143    | 74           | 63     | 71           |
| VEC                      | 9     | 10           | 26     | 29           | 23     | 35           |
| LVEC                     | 3     | 62           | 5      | 2            | 2      | 0            |
| Tip                      | 7     | 4            | 27     | 6            | 3      | 21           |
| Cycling                  | 1     | 2            | 4      | 3            | 0      | 32           |
| Unknown                  | 5     | 4            | 17     | 12           | 9      | 14           |

GEC glomerular endothelial cells; IEG immediate early gene; PCEC peritubular capillary cells; AA arterioles/afferent arteriole; EA efferent arteriole; DVR descending vasa recta; AVR ascending vasa recta; VEC venous endothelial cells; LVEC lymphatic vascular endothelial cells; Tip cells

**Table S2.** Differentially expressed genes comparing Lean and *ob/ob* mice

|            | 6 wks |     |       | 11 wks |     |       | 20 wks |     |       |
|------------|-------|-----|-------|--------|-----|-------|--------|-----|-------|
| Population | down  | up  | total | down   | up  | total | down   | up  | total |
| GEC        | 121   | 618 | 739   | 62     | 39  | 101   | 151    | 34  | 185   |
| PCEC       | 205   | 277 | 482   | 786    | 106 | 892   | 351    | 133 | 484   |
| AA         | 0     | 2   | 2     | 0      | 0   | 0     | 0      | 2   | 2     |
| EA         | 12    | 28  | 40    | 2      | 0   | 2     | 34     | 5   | 39    |
| DVR        | 2     | 9   | 11    | 0      | 5   | 5     | 1      | 2   | 3     |
| AVR        | 16    | 33  | 49    | 6      | 5   | 11    | 43     | 2   | 45    |
| VEC        | 0     | 0   | 0     | 0      | 0   | 0     | 3      | 2   | 5     |

*GEC* glomerular endothelial cells; *PCEC* peritubular capillary cells; *AA* arterioles/afferent arteriole; *EA* efferent arteriole; *DVR* descending vasa recta; *AVR* ascending vasa recta; *VEC* venous endothelial cells

**Table 3S.** RNAscope probes and reagents

| <b>Probe (mouse gene)</b>            | <b>Type</b> | <b>Lot</b>       | <b>Reference</b> |
|--------------------------------------|-------------|------------------|------------------|
| <i>Mm-Calca</i>                      | C1          | 18012B           | 420361           |
| <i>Mm-Gata5</i>                      | C1          | 18205A           | 549061           |
| <i>Mm-Slc14a1</i>                    | C1          |                  | 448001           |
| <i>Mm-Cldn5</i>                      | C3          | 19297B           | 491611-C3        |
| <i>Mm-Aqp1</i>                       | C2          | 19179I           | 504741-C2        |
| <i>Mm-Igf1</i>                       | C2          |                  | 443901-C2        |
| <i>Mm-Sele</i>                       | C1          | 19042A           | 438621           |
| <i>Mm-Car8</i>                       | C2          | 19179I           | 514171-C2        |
| <i>Mm-Gper1</i>                      | C3          | 19179I           | 475251-C3        |
| <i>Mm-Ace</i>                        | C1          | 18218A           | 442731           |
| <i>Mm-Il33</i>                       | C1          |                  | 400591           |
| <i>Mm-Fos</i>                        | C2          | 19176C           | 316921-C2        |
| <i>Mm-Junb</i>                       | C1          | 18278B           | 556651           |
| <i>Mm-Atf3</i>                       | C3          | 19179I           | 426891-C3        |
| <i>Mm-Pecam1</i>                     | C3          | 18355C           | 316721-C3        |
| <i>Mm-Plvap</i>                      | C1          | 19323A           | 440221           |
| <i>Mm-Plvap</i>                      | C3          | 20072C           | 440221-C3        |
| <i>Mm-Acta2</i>                      | C2          | 19316C           | 319531-C2        |
| <i>Mm-Acta2</i>                      | C1          | 20281B           | 319531           |
| <i>Mm-Igfbp5</i>                     | C1          |                  | 425731           |
| <b>Reagents</b>                      | <b>Type</b> | <b>Lot</b>       | <b>Reference</b> |
| Protease III                         |             | 2007018, 2002759 | 322340           |
| 3-plex Positive Control Probe        |             |                  | 320881           |
| 3-plex Negative Control Probe        |             |                  | 320871           |
| Multiplex Fluorescent Reagent Kit v2 |             | 2007959, 2010572 | 323100           |
| Multiplex Fluorescent Reagent        |             | 2007507          | 320851           |
| Wash Buffer                          |             |                  | 310091           |
| Opal520 Reagent                      |             | 200106003        | FP1487001KT      |
| Opal570 Reagent                      |             | 200106008        | FP1488001KT      |
| Opal690 Reagent                      |             | 200106010        | FP1497001KT      |



**Table S4.** Antibodies

| <b>Name (protein/antigen)</b> | <b>Company</b>           | <b>Reference</b> | <b>Host</b> | <b>Lot</b>   | <b>Dilution</b> |
|-------------------------------|--------------------------|------------------|-------------|--------------|-----------------|
| Endomucin                     | Abcam                    | AB106100         | rat         |              | 1:200           |
| Plvap                         | BD Bioscience            | 550563           | rat         | 9324203      | 1:200           |
| Podocalyxin                   | R&D Systems              | AF1556           | goat        |              | 1:200           |
| Pecam1-FITC                   | BD Bioscience            | AF553370         | rat         | 56813        | 1:200           |
| Pecam1                        | Abcam                    | Ab28364          | rabbit      | GR3247742-11 | 1:200           |
| Desmin                        | Abcam                    | Ab15200          | rabbit      |              | 1:200           |
| Collagen IV                   | BioRad                   | 134001           | goat        |              | 1:200           |
| anti goat IgG-Alexa633        | Thermo Fisher Scientific | A21082           | donkey      | 1889311      | 1:200           |
| anti rabbit IgG-Alexa680      | Thermo Fisher Scientific | A10043           | donkey      | 1917929      | 1:200           |
| Anti rat IgG-Alexa633         | Thermo Fisher Scientific | A21094           |             | 2002975      | 1:200           |
| Hoechst33342                  | Thermo Fisher Scientific | H3570            |             | 1664690      | 1:1000          |
