# Supplementary material for: Renal Endothelial Single-Cell Transcriptomics Reveals Spatiotemporal Regulation and Divergent Roles of Differential Gene Transcription and Alternative Splicing in Murine Diabetic Nephropathy
Source: Int J Mol Sci. 2024 Apr 13;25(8):4320. doi: 10.3390/ijms25084320 (PMC11050020; doi:10.3390/ijms25084320)
Supplement: Supplementary file 1 [file ijms-25-04320-s001.zip]

Archive with 7 entries (7 files):
- Supplemental Figures and Tables final.pdf
- Supplemental File S1_DEGs in EC populations.xlsx
- Supplemental File S2_IPA analysis all data.pdf
- Supplemental File S3_ DEGs lean vs obese.xlsx
- Supplemental FIle S4_Oxidative phosphorylation.xlsx
- Supplemental File S5_EIF2 signaling.xlsx
- Supplemental File S6_Significant DSE with Sachimi plot links.xlsx
